# Supplementary material for: Genome-wide identification of growth-regulating factors in moso bamboo (Phyllostachys edulis): in silico and experimental analyses
Source: PeerJ. 2019 Sep 12;7:e7510. doi: 10.7717/peerj.7510 (PMC6769349; doi:10.7717/peerj.7510)
Supplement: Supplemental Information 1 [file peerj-07-7510-s001.xlsx]

## Sheet: Sheet1
Table S1. Primers used in this study
Used for	Names	Sequences (5’-3’)
		Forward	Reverse
Gene isolation	PeGRF11	ATGAAAGCGCTTGTGGCATCAGTCCCTG	TGTAGACTCCACAGCAGCTGGTGCTGCC
Subcellular localization	PeGRF11	GCTCTAGAATGAAAGCGCTTGTGGCATCAGT (Xba I site is underlined)	CGGGATCCTGTAGACTCCACAGCAGCTG (BamH I site is underlined)
Transcriptional activation	PeGRF11	CGGAATTCATGAAAGCGCTTGTGGCATCAG (EcoR I site is underlined)	CGGGATCCTGTAGACTCCACAGCAGCTG (BamH I site is underlined)
Yeast-two hybridization assay	PeGRF11-BD	CGGAATTCATGAAAGCGCTTGTGGCATCAG (EcoR I site is underlined)	CGGGATCCTGTAGACTCCACAGCAGCTG (BamH I site is underlined)
	PeGIF3-AD	CGGAATTCATGCAGCAGCCGATGCCCAT (EcoR I site is underlined)	CGGGATCCGGACTTTTCTGCTACATCGC (BamH I site is underlined)
Bimolecular fluorescence complementation (BiFC)	PeGRF11 YN	CGGGATCCATGAAAGCGCTTGTGGCATCA (BamH I site is underlined)	GCTCTAGATGTAGACTCCACAGCAGCTGG(Xba I site is underlined)
	PeGIF3 YC	GCTCTAGAATGCAGCAGCCGATGCCCAT (Xba I site is underlined)	CGGGATCCGGACTTTTCTGCTACATCGC (BamH I site is underlined)
