# Supplementary material for: Genome-wide identification of growth-regulating factors in moso bamboo (Phyllostachys edulis): in silico and experimental analyses
Source: PeerJ. 2019 Sep 12;7:e7510. doi: 10.7717/peerj.7510 (PMC6769349; doi:10.7717/peerj.7510)
Supplement: Supplemental Information 5 [file peerj-07-7510-s005.xlsx]

## Sheet: Sheet1
Table S5. Gene ontology annotation of PeGRF proteins.
Gene name	Number of GO	Gos	Annotation
PeGRF1	5	F:GO:0005524; C:GO:0005634; P:GO:0006351; P:GO:0006355; P:GO:0032502	F:ATP binding	C:nucleus	P:transcription, DNA-templated	P:regulation of transcription, DNA-templated	P:developmental process
PeGRF2	4	F:GO:0005524; C:GO:0005634; P:GO:0006355; P:GO:0032502	F:ATP binding	C:nucleus	P:regulation of transcription, DNA-templated	P:developmental process
PeGRF3	4	F:GO:0005524; C:GO:0005634; P:GO:0006355; P:GO:0032502	F:ATP binding	C:nucleus	P:regulation of transcription, DNA-templated	P:developmental process
PeGRF4	4	F:GO:0005524; C:GO:0005634; P:GO:0006355; P:GO:0048731	F:ATP binding	C:nucleus	P:regulation of transcription, DNA-templated	P:system development
PeGRF5	7	F:GO:0005515; F:GO:0005524; C:GO:0005634; P:GO:0008283; P:GO:0045893; P:GO:0048316; P:GO:0048366	F:protein binding	F:ATP binding	C:nucleus	P:cell population proliferation	P:positive regulation of transcription, DNA-templated	P:seed development	P:leaf development
PeGRF6	5	F:GO:0005524; C:GO:0005634; P:GO:0006355; C:GO:0016021; P:GO:0032502	F:ATP binding	C:nucleus	P:regulation of transcription, DNA-templated	C:integral component of membrane	P:developmental process
PeGRF7	6	F:GO:0005515; F:GO:0005524; C:GO:0005634; P:GO:0006355; P:GO:0008283; P:GO:0048366	F:protein binding	F:ATP binding	C:nucleus	P:regulation of transcription, DNA-templated	P:cell population proliferation	P:leaf development
PeGRF8	4	F:GO:0005524; C:GO:0005634; P:GO:0006355; P:GO:0032502	F:ATP binding	C:nucleus	P:regulation of transcription, DNA-templated	P:developmental process
PeGRF9	5	F:GO:0005524; C:GO:0005634; P:GO:0006355; C:GO:0016021; P:GO:0032502	F:ATP binding	C:nucleus	P:regulation of transcription, DNA-templated	C:integral component of membrane	P:developmental process
PeGRF10	5	F:GO:0005524; C:GO:0005634; P:GO:0006351; P:GO:0006355; P:GO:0032502	F:ATP binding	C:nucleus	P:transcription, DNA-templated	P:regulation of transcription, DNA-templated	P:developmental process
PeGRF11	6	F:GO:0005515; F:GO:0005524; C:GO:0005634; P:GO:0006355; P:GO:0008283; P:GO:0048366	F:protein binding	F:ATP binding	C:nucleus	P:regulation of transcription, DNA-templated	P:cell population proliferation	P:leaf development
PeGRF12	5	F:GO:0005524; C:GO:0005634; P:GO:0006351; P:GO:0006355; P:GO:0032502	F:ATP binding	C:nucleus	P:transcription, DNA-templated	P:regulation of transcription, DNA-templated	P:developmental process
PeGRF13	4	F:GO:0005524; C:GO:0005634; P:GO:0006355; P:GO:0032502	F:ATP binding	C:nucleus	P:regulation of transcription, DNA-templated	P:developmental process
PeGRF14	7	F:GO:0005515; F:GO:0005524; C:GO:0005634; P:GO:0008283; P:GO:0045893; P:GO:0048316; P:GO:0048366	F:protein binding	F:ATP binding	C:nucleus	P:cell population proliferation	P:positive regulation of transcription, DNA-templated	P:seed development	P:leaf development
PeGRF15	6	F:GO:0005515; F:GO:0005524; C:GO:0005634; P:GO:0006355; P:GO:0008283; P:GO:0048366	F:protein binding	F:ATP binding	C:nucleus	P:regulation of transcription, DNA-templated	P:cell population proliferation	P:leaf development
PeGRF16	4	F:GO:0005524; C:GO:0005634; P:GO:0006355; P:GO:0032502	F:ATP binding	C:nucleus	P:regulation of transcription, DNA-templated	P:developmental process
PeGRF17	4	F:GO:0005524; C:GO:0005634; P:GO:0006355; P:GO:0032502	F:ATP binding	C:nucleus	P:regulation of transcription, DNA-templated	P:developmental process
PeGRF18	6	F:GO:0005524; C:GO:0005634; P:GO:0006355; P:GO:0009739; P:GO:0030912; P:GO:0032502	F:ATP binding	C:nucleus	P:regulation of transcription, DNA-templated	P:response to gibberellin	P:response to deep water	P:developmental process
