# Supplementary material for: Genome-wide identification of growth-regulating factors in moso bamboo (Phyllostachys edulis): in silico and experimental analyses
Source: PeerJ. 2019 Sep 12;7:e7510. doi: 10.7717/peerj.7510 (PMC6769349; doi:10.7717/peerj.7510)
Supplement: Supplemental Information 6 [file peerj-07-7510-s006.xlsx]

## Sheet: Sheet1
Table S6 Promoter analysis of the PeGRF gene family
Classification	Element	Organism	Function	Gene name
				PeGRF1	PeGRF2	PeGRF3	PeGRF4	PeGRF5	PeGRF6	PeGRF7	PeGRF8	PeGRF9	PeGRF10	PeGRF11	PeGRF12	PeGRF13	PeGRF14	PeGRF15	PeGRF16	PeGRF17
Plant growth and development	CAT-box	Arabidopsis thaliana	cis-acting regulatory element related to meristem expression					1	2					1			1	1
	CCGTCC-box	Petroselinum hortense	cis-acting regulatory element related to meristem specific activation				1	1			1			1				1		1
	Skn-1_motif	Oryza sativa	cis-acting regulatory element required for endosperm expression	3		3	2	5	2	1	2	3	1	2	1	5	3	8	3	5
	GCN4_motif	Oryza sativa	cis-regulatory element involved in endosperm expression	1			2		1	1		1	1		2	3	1			1
	RY-element	Helianthus annuus, Oryza sativa	cis-acting regulatory element involved in zein metabolism regulation	1
	O2-site	Zea mays	cis-acting regulatory element involved in zein metabolism regulation					1						1	1			3		2
	circadian	Lycopersicon esculentum	cis-acting regulatory element involved in circadian control	1		5		2			2	1	1	1	1	2	4	2	1	3
Phytohormone responsive	ABRE	Arabidopsis thaliana, Oryza sativa	cis-acting element involved in the abscisic acid responsiveness	2		4	2			1	1			1		2	2	1
	motif IIb	Oryza sativa	abscisic acid responsive element	1								1
	CE1	Hordeum vulgare	cis-acting element associated to ABRE, involved in ABA responsiveness											1
	CGTCA-motif	Hordeum vulgare	cis-acting regulatory element involved in the MeJA-responsiveness	1		4	1	4	1		1	2	1	3	4	5	1	5	3	5
	TGACG-motif	Hordeum vulgare	cis-acting regulatory element involved in the MeJA-responsiveness	1		4	1	4	1		1	2	1	3	4	5	1	5	3	5
	GARE-motif	Brassica oleracea	gibberellin-responsive element				2		2			2					2			1
	P-box	Oryza sativa	gibberellin-responsive element	2		1		1	3			2				1		2
	TCA-element	Brassica oleracea, Nicotiana tabacum	cis-acting element involved in salicylic acid responsiveness		1				2	1	2	1	1	1	1	1
	TGA-element	Brassica oleracea	auxin-responsive element	1			2								1	2		1
	AuxRR-core	Nicotiana tabacum	cis-acting regulatory element involved in auxin responsiveness					1	1			2
	TGA-box	Glycine max	part of an auxin-responsive element															2
Abiotic and biotic stresses	HSE	Helianthus annuus, Lycopersicon esculentum	cis-acting element involved in heat stress responsiveness						1		5	1	1	3		4	1	3		1
	LTR	Hordeum vulgare	cis-acting element involved in low-temperature responsiveness		1		1	1					1			1
	C-repeat/DRE	Arabidopsis thaliana	regulatory element involved in cold- and dehydration-responsiveness			1									1
	TC-rich repeats	Nicotiana tabacum	cis-acting element involved in defense and stress responsiveness			1		2			2			4	1		2	2	1
	WUN-motif	Nicotiana glutinosa	wound-responsive element														1
	ARE	Zea mays	cis-acting regulatory element essential for the anaerobic induction		2	2	1	3	4	1		3	2	1			1	2		1
	GC-motif	Zea mays	enhancer-like element involved in anoxic specific inducibility	2		1			5			5				1	1			1
	Box-W1	Petroselinum crispum	fungal elicitor responsive element			1							1		2	1
	MBS	Arabidopsis thaliana	MYB binding site involved in drought-inducibility					3	1	1		1					1			3
